# Supplementary material for: Safety of performing transoesophageal echocardiography in patients with oesophageal varices
Source: PubMed Central journal article supplement — Heart Asia. 2019 Jun 12;11(2):e011223. doi: 10.1136/heartasia-2019-011223 (PMC6579576; doi:10.1136/heartasia-2019-011223), 2019-06-12
Supplement: heartasia-2019-011223supp001.pdf [file heartasia-2019-011223supp001.pdf]

**Supplemental Table 1:** International Classification of Diseases, Tenth Revision, Clinical Modification/Procedure Coding System (ICD-10-CM/PCS) codes used to define baseline characteristics, comorbidities, and in-hospital and post-procedural complications from the 2016 Nationwide Readmissions Data (NRD).

| Diagnosis                        | ICD-10-CM/PCS                                                                                                                                                                                                                                                                                                                                                                                                   |
|----------------------------------|-----------------------------------------------------------------------------------------------------------------------------------------------------------------------------------------------------------------------------------------------------------------------------------------------------------------------------------------------------------------------------------------------------------------|
| Esophageal Varices               | 'I8500', 'I8501', 'I8510', 'I8511'                                                                                                                                                                                                                                                                                                                                                                              |
| Transesophageal Echocardiography | 'B240ZZ4', 'B241ZZ4', 'B244ZZ4', 'B245ZZ4', 'B245ZZ4', 'B24BZZ4', 'B24CZZ4', 'B24DZZ4'                                                                                                                                                                                                                                                                                                                          |
| Chronic Liver Disease            | 'B180','B181','B182','I8500', 'I8501','I8510', 'I8511','K700','K702','K7030','K7031', 'K7040', 'K7041','K709', 'K7210','K7211','K7290', 'K7291','K730', 'K731', 'K732', 'K738', 'K739', 'K740','K741', 'K742', 'K743','K744', 'K745', 'K7460', 'K7469', 'K754','K7581','K760','K766', 'K7689','K769','Z944'                                                                                                     |
| Alcoholism                       | 'F1010','F1011','F10120','F10121','F10129','F1014','F10150','F10151','F10159','F10180','F10181','F10182','F10188','F1019','F1020','F1021','F10220','F10221','F10229','F10230','F10231','F10232','F10239','F1024','F10250','F10251','F10259','F1026','F1027','F10280','F10281','F10282','F10288','F1029','F10921','F1094','F10950','F10951','F10959','F1096','F1097','F10980','F10981','F10982','F10988','F1099' |
| Chronic Peptic Ulcer Disease     | 'K254','K255','K256', 'K257', 'K259', 'K264', 'K265','K266', 'K267', 'K269', 'K274', 'K275', 'K276', 'K277', 'K279', 'K284', 'K285', 'K286', 'K287', 'K289'                                                                                                                                                                                                                                                     |
| Bacteremia                       | 'R7881'                                                                                                                                                                                                                                                                                                                                                                                                         |
| Infective Endocarditis           | 'I330', 'I339', 'I38', 'I39', 'A3951', 'A5203', 'B376'                                                                                                                                                                                                                                                                                                                                                          |

|                             |                                                                                                                                                                                                                                        |
|-----------------------------|----------------------------------------------------------------------------------------------------------------------------------------------------------------------------------------------------------------------------------------|
| Coronary Artery Disease     | 'I2510' to 'I252', 'I257.xx', 'I25810', 'I2582', 'I2583','I2584',<br>'I2589', 'I259', 'I255', 'Z951', 'Z955', 'Z9861'                                                                                                                  |
| Congestive Heart Failure    | 'I0981', 'I501','I5020','I5021', 'I5022', 'I5023', 'I5030', 'I5031',<br>'I5032', 'I5033', 'I5040', 'I5041', 'I5042', 'I5043','I50810',<br>'I50811', 'I50812', 'I50813', 'I50814', 'I5082', 'I5083', 'I5084',<br>'I5089', 'I509'        |
| Valvular Heart Disease      | 'A5203', 'I050' to 'I0989', 'I340' to 'I341' to 'I39', 'Q230',<br>'Q231', 'Q232', 'Q233','Z952', 'Z953', 'Z954'                                                                                                                        |
| Peripheral Vascular Disease | 'I70.XX', 'I710' to 'I729', 'I731', 'I7381', 'I7389', 'I739', 'I742',<br>'I743', 'I744', 'I76', 'I771', 'I7770', to 'I7779', 'I790', 'I791',<br>'I798', 'K551', 'K558', 'K559', 'Z95820', 'Z95828'                                     |
| Hyperlipidemia              | 'E780', 'E7800', 'E7801', 'E781', 'E782', 'E783', 'E784',<br>'E785','E7881', 'E7889', 'E8889', 'E789'                                                                                                                                  |
| Diabetes Mellitus           | 'E0800' to 'E139', 'O24011' to 'O2433', 'O24811' to 'O2493',<br>'P702'                                                                                                                                                                 |
| Hypertension                | 'I129' to 'I132', 'I150', 'I151', 'I120', 'I10', 'O10011' to 'O1003',<br>'O10911' to 'O1093', 'I160','I161', 'I169', 'I674', 'O10111' to<br>'O1013', 'O10211' to 'O1033','O10411' to 'O1043','O110' to<br>'I119','I152', 'I158','I159' |
| Chronic Kidney Disease      | 'N183','N184', 'N185', 'N186', 'N189', 'N19', 'Z4901', 'Z4902',<br>'Z4931','Z4932','Z9115', 'Z940', 'Z992'                                                                                                                             |
| Chronic Pulmonary Disease   | 'J40' to 'J45998', 'J470', 'J471','J479', 'J60' to 'J64', 'J660' to<br>'J679', 'J684'                                                                                                                                                  |

|                                           |                                                                                                                      |
|-------------------------------------------|----------------------------------------------------------------------------------------------------------------------|
| Obesity                                   | 'E6601', 'E6609', 'E661', 'E662', 'E668', 'E669', 'O99210' to 'O99215', 'R939', 'Z6830', 'Z6831' to 'Z6845', 'Z6854' |
| Smoking                                   | 'Z87891', 'F17200' to 'F17229', 'F17290', 'F17293', 'F17298', 'F17299'                                               |
| Long-term Antiplatelets                   | 'Z7902'                                                                                                              |
| Long-term Anticoagulation                 | 'Z7901'                                                                                                              |
| Abnormal Coagulation Profile              | 'R791'                                                                                                               |
| Post-procedural Gastrointestinal Bleeding | 'k91840', 'k91841', 'k9161', 'k9162', 'k91870', 'k91871', 'k920', 'k921', 'k922', 'k226', 'd62'                      |
| Esophageal Perforation                    | 'k9171', 'k9172', 'k223'                                                                                             |
| Thrombocytopenia                          | 'D696', 'D6959'                                                                                                      |

**Supplemental Table 2:** Multivariable regression models estimating the association of the common covariables with the in-hospital all-cause mortality of EV-TEE group.

| Covariable                  | Multivariable* |         |       |
|-----------------------------|----------------|---------|-------|
|                             | OR             | 95%CI   | P     |
| Female                      | 0.9            | 0.8-0.9 | <0.01 |
| Bacteremia                  | 0.8            | 0.6-1.1 | 0.10  |
| Infective endocarditis      | 2.2            | 1.7-3.0 | <0.01 |
| Coronary artery disease     | 0.8            | 0.7-0.9 | <0.01 |
| Congestive heart failure    | 1.4            | 1.3-1.6 | <0.01 |
| Valvular heart disease      | 0.8            | 0.7-0.9 | <0.01 |
| Chronic kidney disease      | 1.9            | 1.8-2.1 | <0.01 |
| Peripheral vascular disease | 1.5            | 1.4-1.7 | <0.01 |
| Diabetes mellitus           | 0.7            | 0.6-0.7 | <0.01 |

|                              |     |         |       |
|------------------------------|-----|---------|-------|
| Hypertension                 | 0.7 | 0.6-0.8 | <0.01 |
| Hyperlipidemia               | 0.8 | 0.7-0.8 | <0.01 |
| Peptic ulcer disease         | 0.9 | 0.8-0.9 | 0.04  |
| Chronic pulmonary disease    | 1.1 | 0.9-1.2 | 0.07  |
| Alcoholism                   | 1.0 | 0.9-1.1 | 0.31  |
| Smoking                      | 0.7 | 0.7-0.8 | <0.01 |
| Long-term anticoagulation    | 0.6 | 0.5-0.7 | <0.01 |
| Abnormal coagulation profile | 1.5 | 1.3-1.8 | <0.01 |

\*Multivariable regression model was adjusted for all covariables listed in the table. OR: odds ratio, P: p-value, 95%CI: 95% confidence interval.

## **Supplemental Figure Legend**

Supplemental Table 1: International Classification of Diseases, Tenth Revision, Clinical Modification/Procedure Coding System (ICD-10-CM/PCS) codes used to define baseline characteristics, comorbidities, and in-hospital and post-procedural complications from the 2016 Nationwide Readmissions Data (NRD).

Supplemental Table 2: Multivariable regression models estimating the association of the common covariables with the in-hospital all-cause mortality of EV-TEE group.
